# Supplementary material for: RNA binding protein PCBP1 is an intracellular immune checkpoint for shaping T cell responses in cancer immunity
Source: PubMed Central journal article supplement — Sci Adv. 2020 May 29;6(22):eaaz3865. doi: 10.1126/sciadv.aaz3865 (PMC7259945; doi:10.1126/sciadv.aaz3865), 2020-05-29
Supplement: aaz3865_SM.pdf [file aaz3865_SM.pdf]

## Supplementary Materials for

### **RNA binding protein PCBP1 is an intracellular immune checkpoint for shaping T cell responses in cancer immunity**

Ephraim A. Ansa-Addo\*, Huai-Cheng Huang, Brian Riesenber, Supinya Iamsawat, Davis Borucki, Michelle H. Nelson, Jin Hyun Nam, Dongjun Chung, Chrystal M. Paulos, Bei Liu, Xue-Zhong Yu, Caroline Philpott, Philip H. Howe, Zihai Li\*

\*Corresponding author. Email: [ephraim.ansa-addo@osumc.edu](mailto:ephraim.ansa-addo@osumc.edu) (E.A.A.-A); [zihai.li@osumc.edu](mailto:zihai.li@osumc.edu) (Z.L.)

Published 29 May 2020, *Sci. Adv.* **6**, eaaz3865 (2020)  
DOI: 10.1126/sciadv.aaz3865

#### **This PDF file includes:**

Figs. S1 to S8  
Table S1

Suppl Figure 1

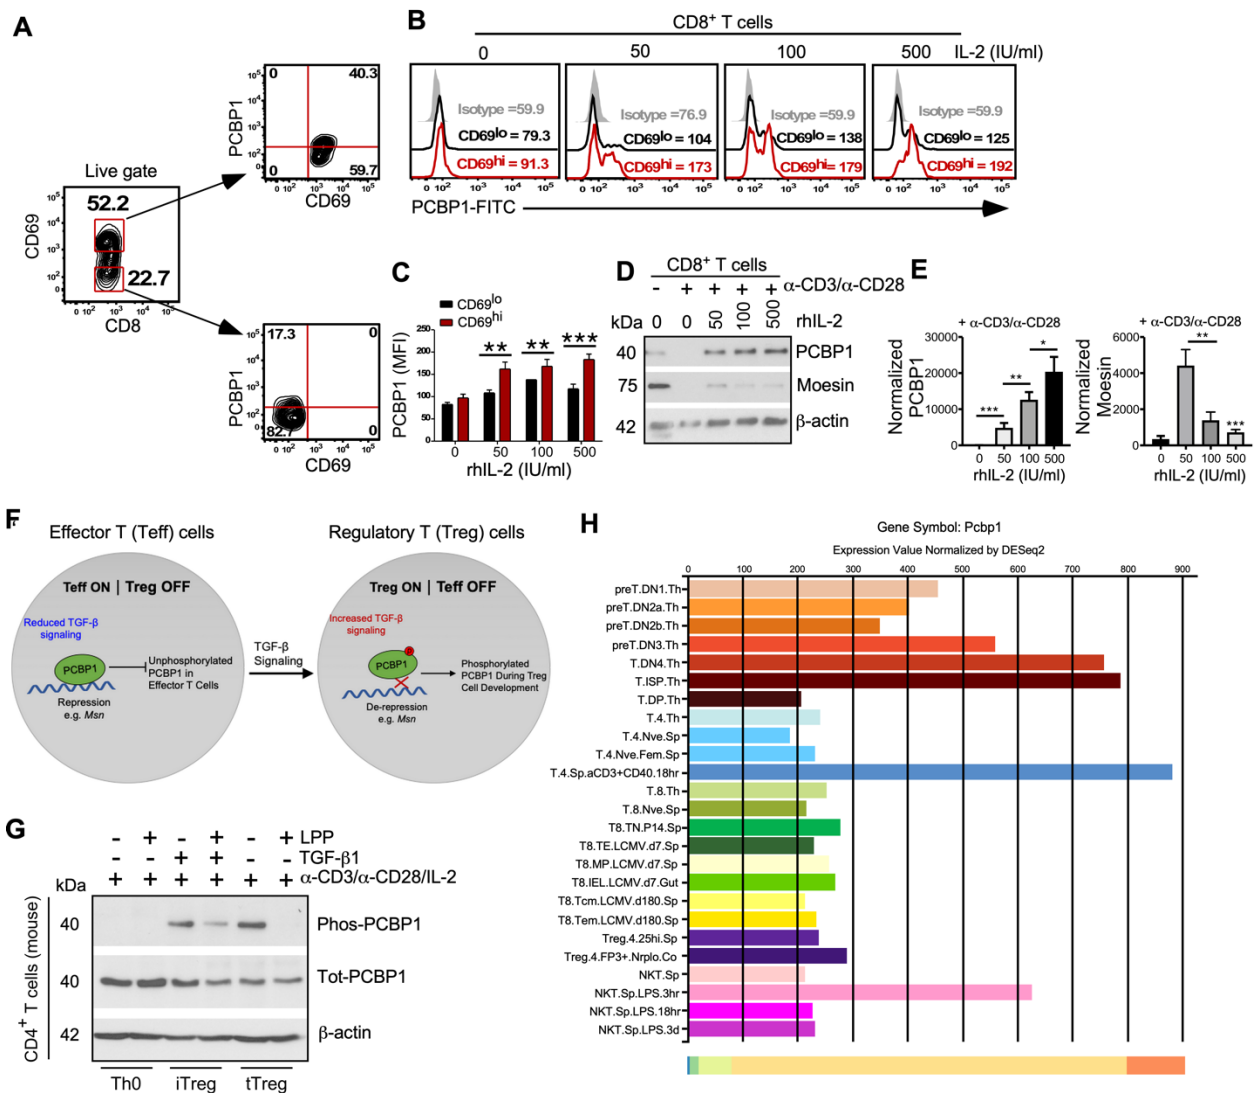

**Fig. S1. Activation-induced and TGF- $\beta$ -mediated phosphorylation of PCBP1 in T cells. (A-E)** Splenic isolated CD8<sup>+</sup> T cells cultured *in vitro* for 3 days with polyclonal anti-CD3/anti-CD28 antibodies and increasing concentrations of IL-2. Representation flow cytometry of PCBP1 expression in CD69<sup>low</sup> and CD69<sup>high</sup> T cells (A and B), and quantification (C). Immunoblotting (D) and quantification (E) for moesin, PCBP1 and  $\beta$ -actin after 3 days. (F) Model depicting unphosphorylated PCBP1 in effector T cells (left) under reduced TGF- $\beta$  conditions, and

phosphorylated PCBP1 under settings of increased TGF- $\beta$  signaling (right). **(G)** Immunoblotting for phosphorylated (Phos-PCBP1) and total PCBP1 (Tot-PCBP1) in CD4<sup>+</sup> T cells polarized *in vitro* without TGF- $\beta$  (Th0) or with TGF- $\beta$  (iTreg) for 3 days, as well as splenic Treg cells (tTregs) before and after incubation with lambda protein phosphatase (LPP).  $\beta$ -actin is used as a loading control. **(H)** Expression of *PCBP1* mRNA in the thymus and peripheral lymphoid organs normalized by DESeq2 - obtained from the Immunological Genome Project ([www.immgen.org](http://www.immgen.org)). (C and E) Error bars represent the mean  $\pm$  SD; \* $P$  < 0.05, \*\* $P$  < 0.01, \*\*\* $P$  < 0.001 (Student's t test); ns, not significant.

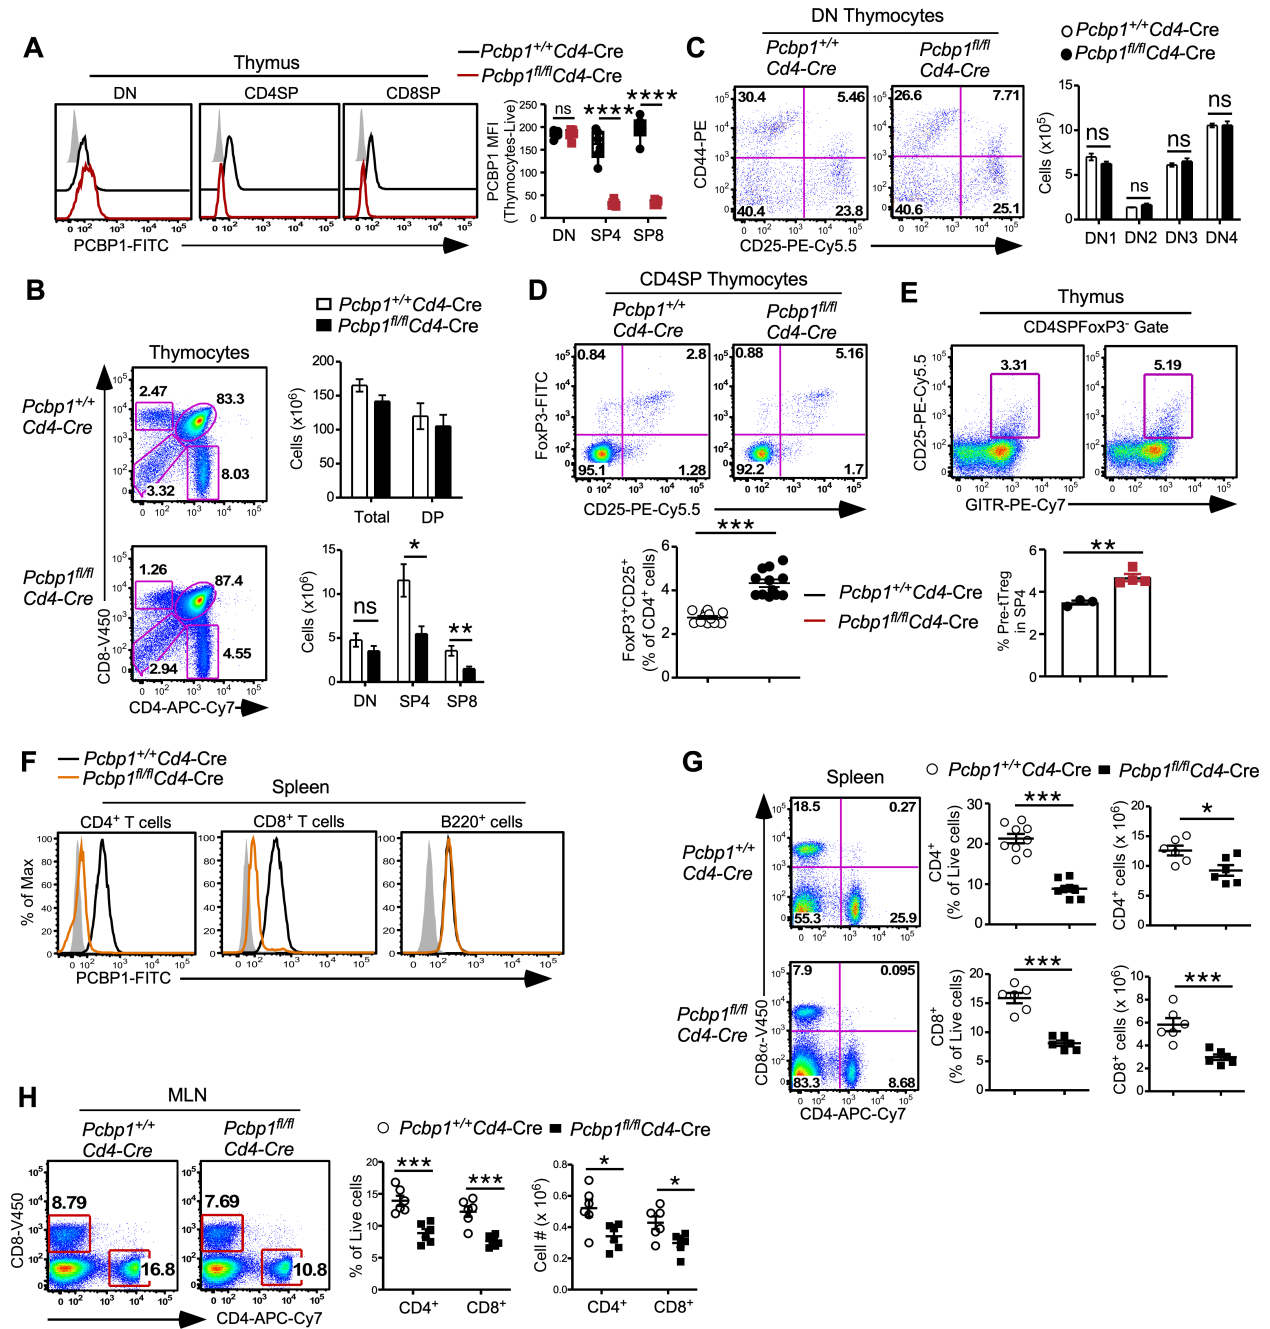

**Fig. S2. Involvement of PCBP1 in T cell development and proliferation.** (A) Flow cytometry for PCBP1 expression in DN, SP4, SP8 thymocytes and quantification; n=6. (B) Analysis of CD4 and CD8 on thymocytes (left) and quantification (right) of cells in various subsets of thymocytes derived from *Pcbp1*<sup>+/+</sup>Cd4-Cre and *Pcbp1*<sup>fl/fl</sup>Cd4-Cre mice (n= 6). (C) Flow cytometry analysis of

CD44 and CD25 on DN thymocytes (left) and quantification of various subsets (right), n= 6. No significance versus wild-type, Student's t test. **(D)** Intracellular FoxP3 and cell-surface CD25 (top) and the percentage of FoxP3<sup>+</sup>CD25<sup>+</sup> cells (bottom) among CD4<sup>+</sup>CD8<sup>-</sup> thymocytes from *Pcbp1<sup>+/+</sup>Cd4-Cre* and *Pcbp1<sup>fl/fl</sup>Cd4-Cre* mice (n= 12). **(E)** Analysis of CD25 and GITR pre-Treg cells on CD4SPFoxP3<sup>-</sup> thymocytes and quantification. **(F)** Expression of PCBP1 in CD4<sup>+</sup>, CD8<sup>+</sup>, B220<sup>+</sup> splenic cells comparing *Pcbp1<sup>fl/fl</sup>* and *Pcbp1<sup>fl/fl</sup>Cd4-Cre* mice, n= 6. **(G)** Flow cytometry analysis of CD4 and CD8 (left) on the proportion (middle) and number (right) of splenocytes in *Pcbp1<sup>+/+</sup>Cd4-Cre* and *Pcbp1<sup>fl/fl</sup>Cd4-Cre* mice (n= 8). **(H)** Flow cytometry analyzing the proportion of CD4 and CD8 (left) and number (right) on live lymph node cells; n= 6. Error bars represent the mean  $\pm$  SE (A-E, G and H); \**P* < 0.05, \*\**P* < 0.01; \*\*\**P* < 0.001 (Student's t test); ns, not significant.

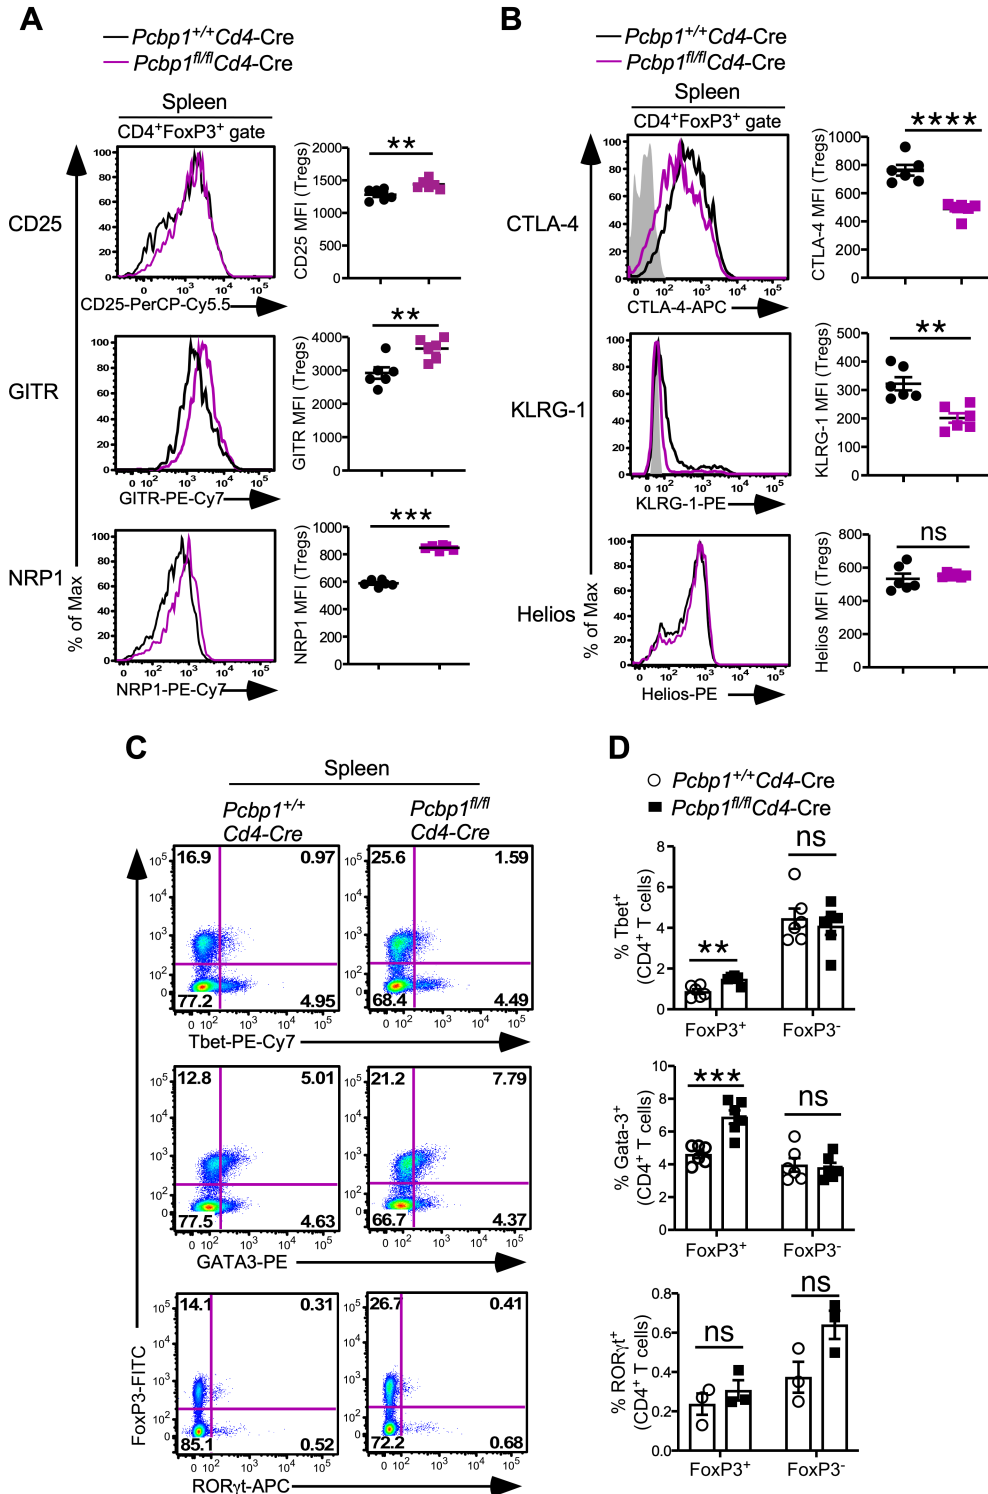

**Fig. S3. Expression of Treg signature molecules and T cell subsets. (A)** Flow cytometry analyzing the expression of CD25, GITR and NRP1 (left) and quantified (right) on splenic CD4<sup>+</sup>FoxP3<sup>+</sup> Tregs from *Pcbp1*<sup>fl/fl</sup> and *Pcbp1*<sup>fl/fl</sup>*Cd4-Cre* mice, n= 6. **(B)** Expression of intracellular

CTLA-4, Helios and surface KLRG-1 GITR and NRP1 (left) and quantified (right) on splenic CD4<sup>+</sup>FoxP3<sup>+</sup> Tregs from *Pcbp1<sup>f/f</sup>* and *Pcbp1<sup>f/f</sup>Cd4-Cre* mice, n= 6. **(C and D)** Flow cytometry analyzing Tbet<sup>+</sup>, GATA-3<sup>+</sup> and RORγt<sup>+</sup> cells (C) and the percentages (D) among splenic CD4<sup>+</sup>FoxP3<sup>+</sup> and CD4<sup>+</sup>FoxP3<sup>-</sup> T cells. Error bars represent the mean ± SE (A, B and D); \*\**P* < 0.01; \*\*\**P* < 0.001, \*\*\*\**P* < 0.0001 (Student's t test); ns, not significant.

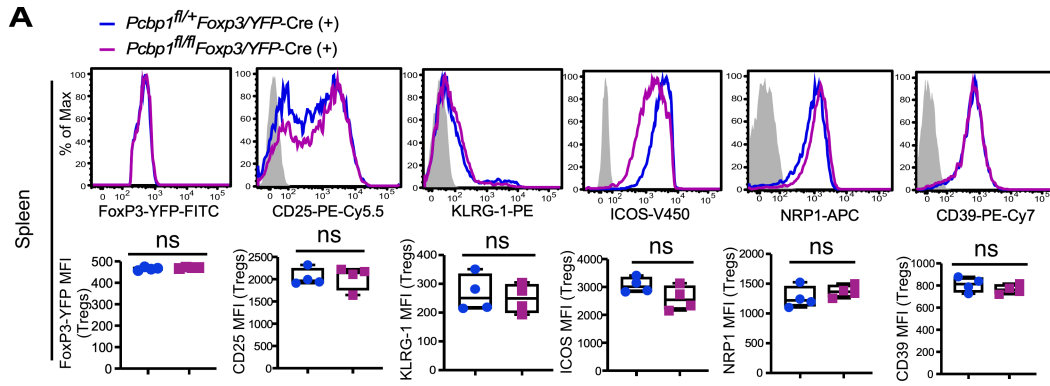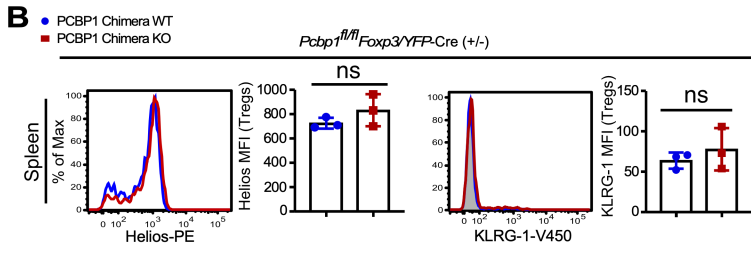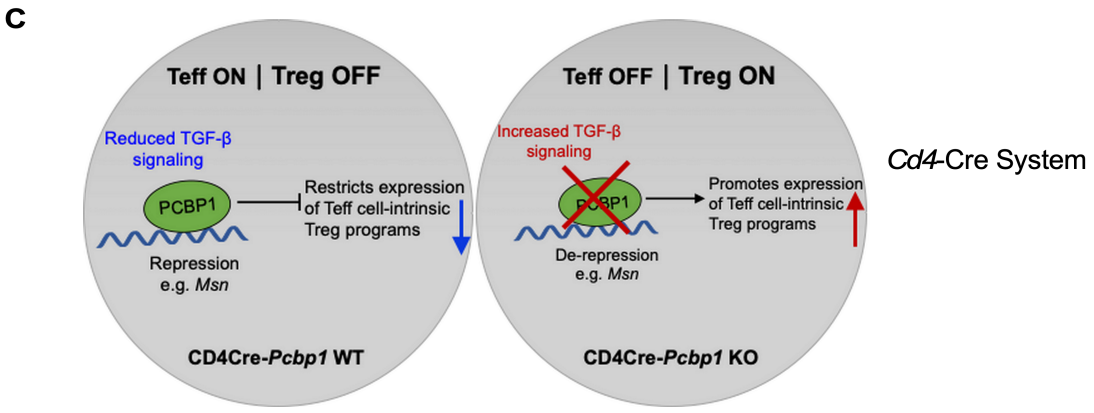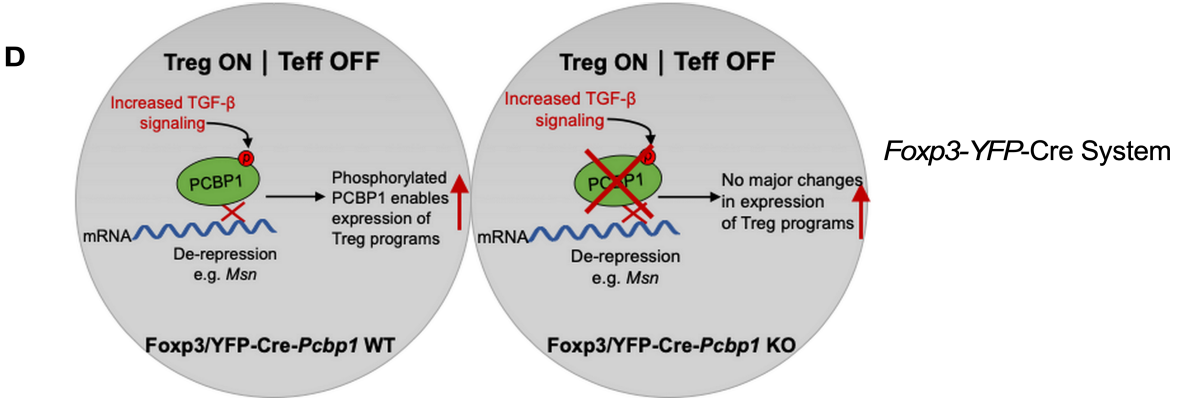



**Fig. S4. PCBP1 in Tregs is redundant for Treg cell maintenance.** (A) Flow cytometry analyzing the expression of Treg signature molecules CD25, KLRG-1, ICOS, NRP1 and CD39 (top) and quantification (bottom) in FoxP3/YFP<sup>+</sup> Treg cells from the spleen of *Pcbp1<sup>fl/fl</sup>Foxp3/YFP-Cre<sup>+</sup>* and *Pcbp1<sup>fl/fl</sup>Foxp3/YFP-Cre<sup>+</sup>* littermate mice, n= 4. (B) Detection of surface KLRG-1 and intracellular Helios expression (left) with quantification (right) in *Pcbp1<sup>fl/fl</sup>Foxp3/YFP-Cre<sup>+/-</sup>* chimera mice gating on PCBP1 chimera WT and PCBP1 chimera KO from the spleen, n= 3. (C and D) Models depicting effects of PCBP1 deletion using the *Cd4-Cre* (C) and *Foxp3-YFP-Cre* (D) genetic systems. Error bars represent the mean  $\pm$  SE (A and B); ns, not significant (Student's t test).

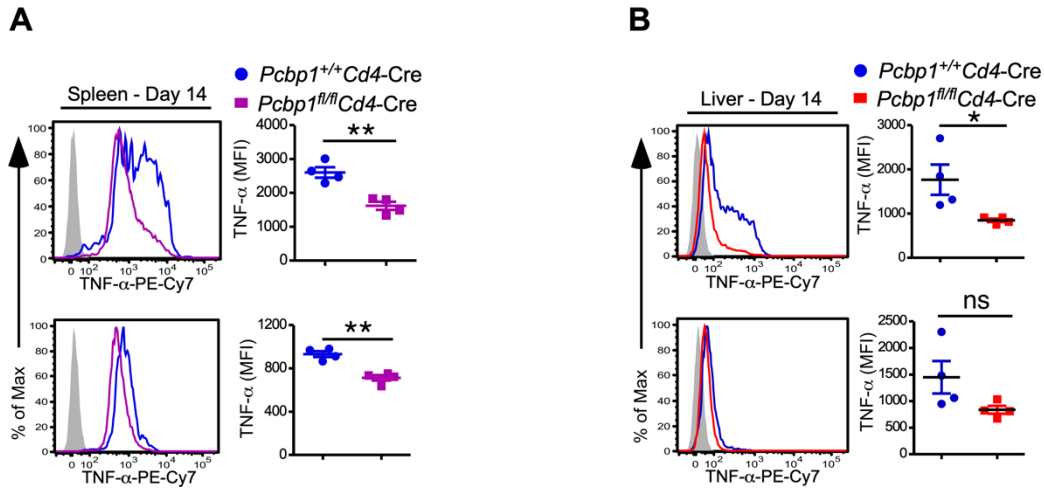

**Fig. S5. Loss of PCBP1 promotes conversion of activated T cells into Tregs and impairs effector T cell functions.** (A and B) Flow cytometry assessment of TNF- $\alpha$  expression (left) and quantified (right) of CD4<sup>+</sup> and CD8<sup>+</sup> T cells from the spleen (A) and liver (B) of *Pcbp1<sup>fl/fl</sup>* and *Pcbp1<sup>fl/fl</sup>Cd4-Cre* littermate mice, n= 4. Error bars represent mean  $\pm$  SEM (A and B); \* $P < 0.05$ , \*\* $P < 0.01$  (Student's t test); ns, not significant.

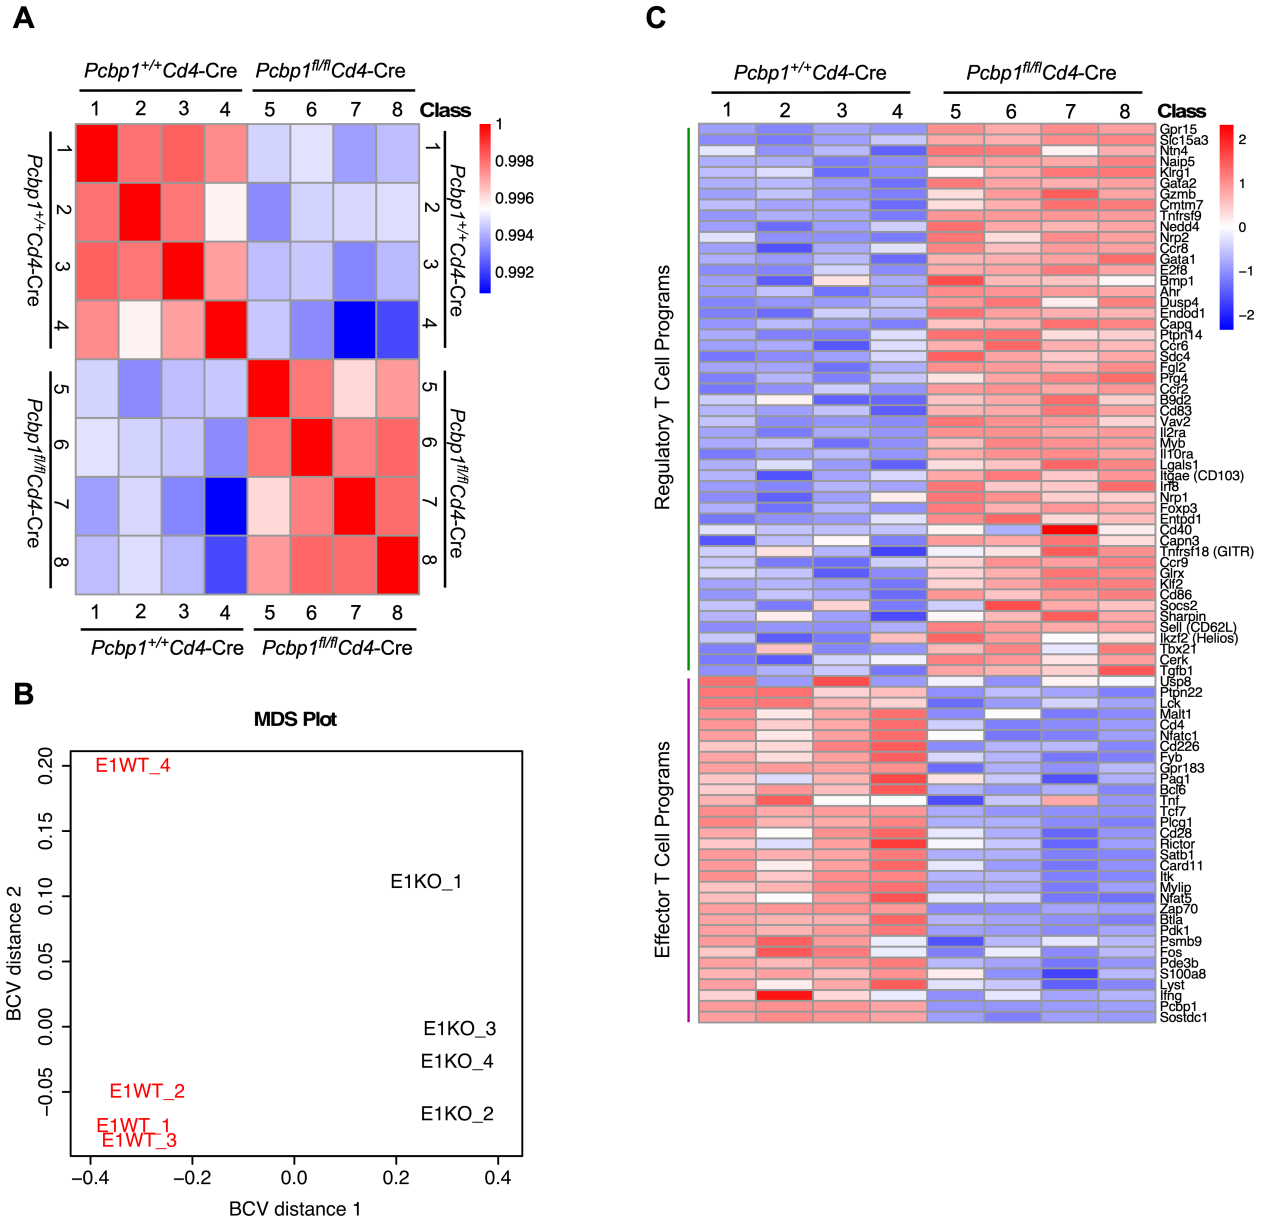

**Fig. S6. RNA-seq data analysis and quality control. (A)** Correlation plot of a log<sub>10</sub>-transformed counts per million (CPM) of eight RNA-seq samples from CD4<sup>+</sup> T cells isolated from the spleen of *Pcbp1<sup>fl/fl</sup>* and *Pcbp1<sup>fl/fl</sup>Cd4-Cre* littermate mice showing high reproducibility at 99%. **(B)** MDS plot of a log<sub>2</sub>-transformed CPM of eight RNA-seq samples. **(C)** Heat map of Treg and Teff cell-signature genes in CD4<sup>+</sup> T cells isolated from the spleen of 6-8 weeks old *Pcbp1<sup>fl/fl</sup>* and *Pcbp1<sup>fl/fl</sup>Cd4-Cre* littermate mice.

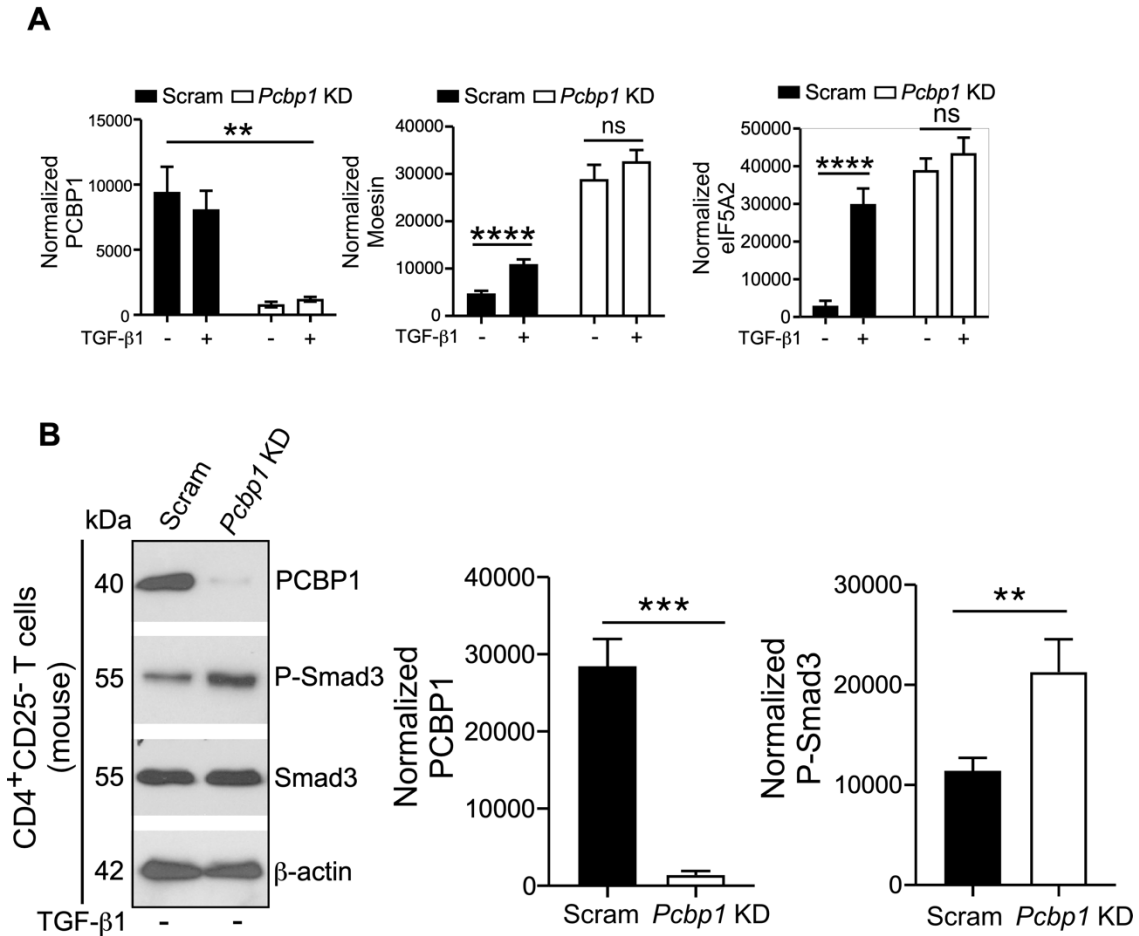

**Fig. S7. Inhibition of PCBP1 promotes TGF- $\beta$  signaling in T cells.** (A) Quantified data of PCBP1, moesin and eIF5A2 for immunoblotting on Fig. 5 A. (B) Immunoblotting of PCBP1 and phosphorylated-Smad3 (P-Smad3), and total Smad3, and quantification using CD4<sup>+</sup>CD25<sup>-</sup> T cells transduced with scrambled (scram) vector, or lentiviral shRNA targeting *Pcbp1* in the absence of TGF- $\beta$ , but with anti-CD3/anti-CD28 antibody. Error bars represent the mean  $\pm$  SE of independent experiments. \*\* $P < 0.01$ ; \*\*\* $P < 0.001$  (Student's t test); ns, no significance.

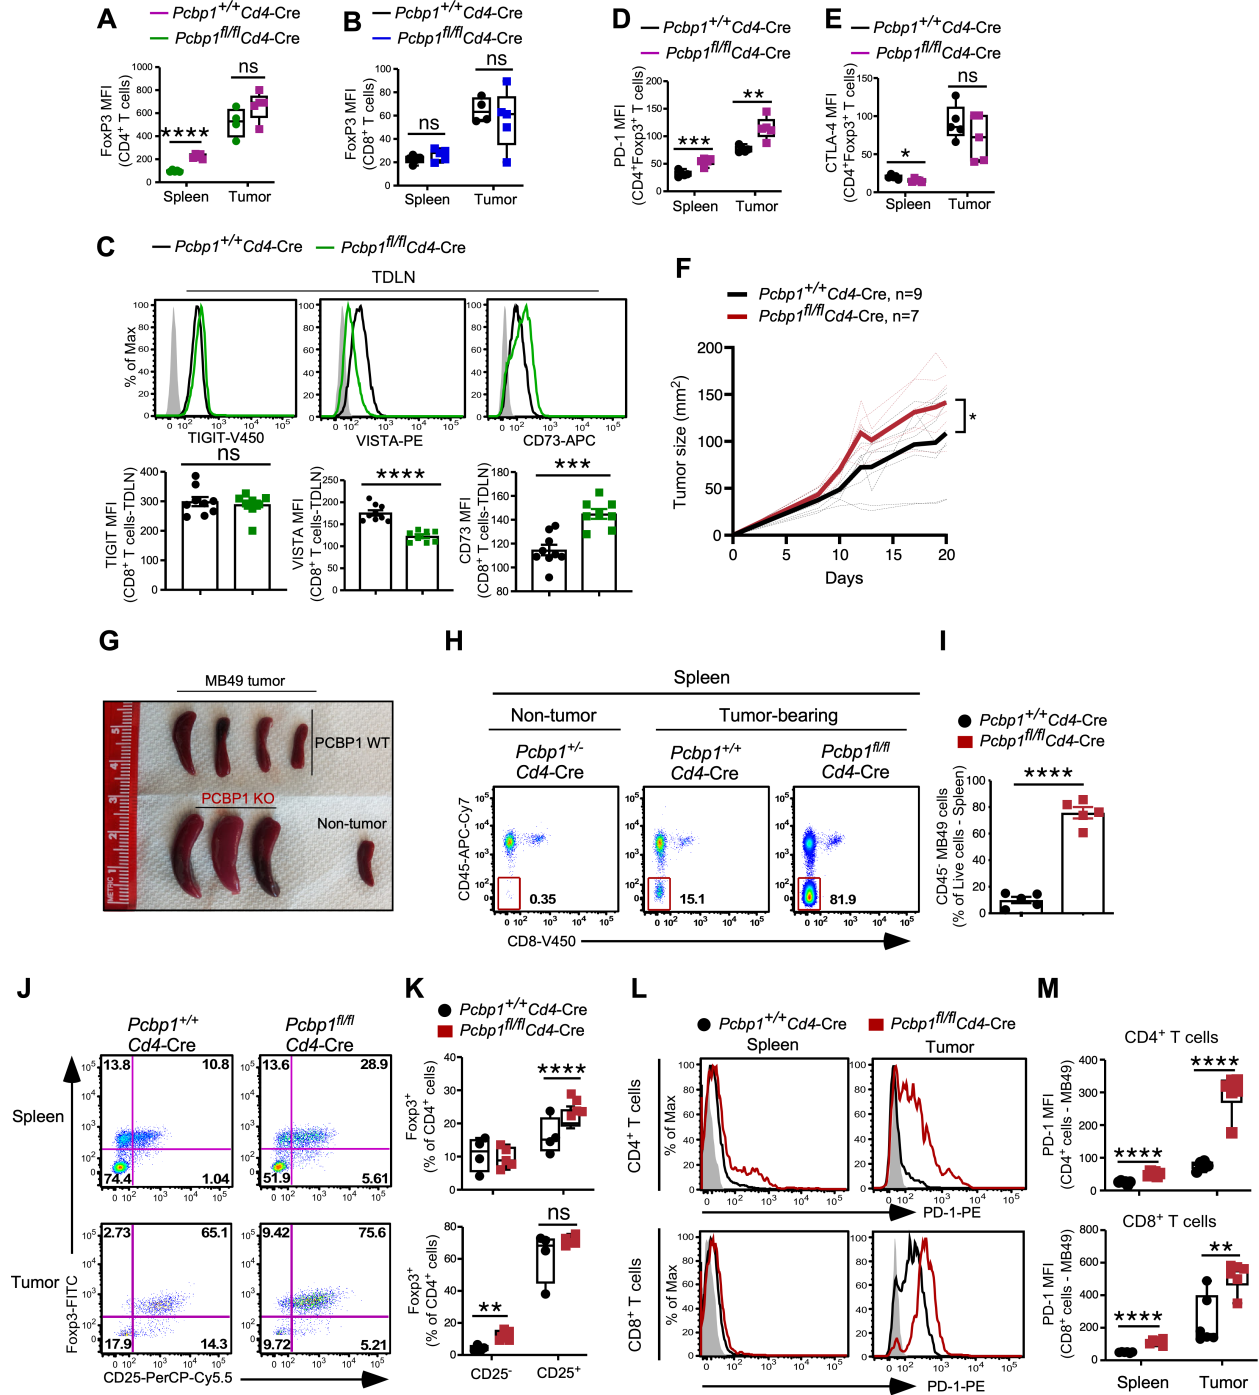

**Fig. S8. Absence of PCBP1 in T cells promotes immune suppression and impairs anti-tumor T cell responses.** (A and B) Flow cytometry analyzing Foxp3 expression in CD4<sup>+</sup> (A) and CD8<sup>+</sup> (B) T cells isolated from the spleen and tumor of *Pcbp1*<sup>fl/fl</sup> (n= 4) and *Pcbp1*<sup>fl/fl</sup>Cd4-Cre (n= 5) mice. (C) Flow cytometric analysis (top) and quantification (bottom) of TIGIT, VISTA and CD73

expression in CD8<sup>+</sup> T cells from the TDLN. Control (n= 9) and *Pcbp1<sup>fl/fl</sup>Cd4-Cre* mice (n= 8). **(D and E)** Analyzed surface expression of the inhibitory checkpoint receptors, PD-1 (D) and CTLA-4 (E) in CD4<sup>+</sup>FoxP3<sup>+</sup> T cells isolated from the spleen and tumor of *Pcbp1<sup>fl/fl</sup>* and *Pcbp1<sup>fl/fl</sup>Cd4-Cre* mice, n= 5). **(F and G)** Tumor growth curve of wild-type control and *Pcbp1<sup>fl/fl</sup>Cd4-Cre* mice that received orthotopic injection of MB49 cells in a bladder cancer model (F) and spleen size at endpoint (G). Photo credit: E.A. Ansa-Addo (The Ohio State University). **(H and I)** Presence of CD45<sup>-</sup> cells (H) and quantification (I) in the spleen of non-tumor bearing and tumor-bearing wild-type (n= 9) and *Pcbp1<sup>fl/fl</sup>Cd4-Cre* mice (n= 7) at endpoint day 20 determined by flow cytometry. **(J and K)** Frequency of FoxP3<sup>+</sup> expressing T cells (J) and quantification (K) among CD25<sup>-</sup> and CD25<sup>+</sup> T cells isolated from the spleen and tumor of *Pcbp1<sup>fl/fl</sup>Cd4-Cre* compared with tumor-bearing *Pcbp1<sup>fl/fl</sup>* littermate mice. **(L and M)** Flow cytometry of PD-1 expression (L) and quantification (M) on CD4<sup>+</sup> and CD8<sup>+</sup> T cells from spleens and tumors collected from control and *Pcbp1<sup>fl/fl</sup>Cd4-Cre* mice, n= 6. Error bars represent the mean  $\pm$  SE (A-E, I, K and M). \**P* < 0.05; \*\**P* < 0.01; \*\*\**P* < 0.001; \*\*\*\**P* < 0.0001 (Student's t test); (F) Two-way analysis of variance (AVONA); ns, no significance.

**Table S1. Key Reagents**

| REAGENT or RESOURCE                    | SOURCE                    | IDENTIFIER                         |
|----------------------------------------|---------------------------|------------------------------------|
| <b>Antibodies</b>                      |                           |                                    |
| Anti-B220-FITC (clone RA3-6B2)         | BioLegend                 | Cat#:103206; RRID:AB_312991        |
| Anti-CD127-APC-Cy7 (clone A7R34)       | BioLegend                 | Cat#:135039; RRID: AB_2566160      |
| Anti-CD24-FITC (clone M1/69)           | BD Biosciences            | Cat#:553261; RRID: AB_394740       |
| Anti-CD25-PE (clone PC61)              | BioLegend                 | Cat#:102008; RRID: AB_312857       |
| Anti-CD25-PE-Cy5.5 (clone PC61.5)      | eBioscience               | Cat#:35-0251-82; RRID: AB_11218898 |
| Anti-CD28 functional (clone 37.51)     | BioLegend                 | Cat#:102110; RRID: AB_312875       |
| Anti-CD3 functional (clone 145-2C11)   | BioLegend                 | Cat#:557306; RRID: AB_1877073      |
| Anti-CD39-PE-Cy7 (clone 24DMs1)        | eBioscience               | Cat#:25-0391-82; RRID: AB_1210766  |
| Anti-CD44-PE (clone IM7)               | BioLegend                 | Cat#:103008; RRID: AB_312959       |
| Anti-CD45-APC-Cy7 (clone 30-F11)       | BD Biosciences            | Cat#:557659; RRID: AB_396774       |
| Anti-CD4-APC-Cy7 (clone GK1.5)         | BD Biosciences            | Cat#:552051; RRID: AB_394331       |
| Anti-CD4-PerCP-Cy5.5 (clone RM4-5)     | eBioscience               | Cat#:45-0042-82; RRID: AB_1107001  |
| Anti-CD5-PE (clone 53-7.3)             | eBioscience               | Cat#:12-0051-82; RRID: AB_465523   |
| Anti-CD62L-PE-Cy7 (clone MEL-14)       | eBioscience               | Cat#:25-0621-82; RRID: AB_469633   |
| Anti-CD69-PE-Cy7 (clone H1.2F3)        | BD Biosciences            | Cat#:552879; RRID: AB_394508       |
| Anti-CD73-APC (clone TY/11.8)          | BioLegend                 | Cat#:127210; RRID: AB_11218786     |
| Anti-CD8 $\alpha$ -FITC (clone 53-6.7) | BD Biosciences            | Cat#:11-0081-85; RRID: AB_464916   |
| Anti-CD8 $\alpha$ -V450 (clone 53-6.7) | eBioscience               | Cat#:48-0081-82; RRID: AB_1272198  |
| Anti-CTLA4-APC (clone UC10-4B9)        | eBioscience               | Cat#:17-1522-82; RRID: AB_2016700  |
| Anti-CTLA4-PE (clone UC10-4F10-11)     | BD Biosciences            | Cat#: 553720; RRID: AB_395005      |
| Anti-eIF5A2 antibody (clone D8L8Q)     | Cell Signaling Technology | Cat#:20765; RRID: AB_2798849       |
| Anti-Foxp3-APC (clone FJK-16s)         | eBioscience               | Cat#:17-5773-82; RRID: AB_469457   |
| Anti-Foxp3-FITC (clone FJK-16s)        | eBioscience               | Cat#:11-5773-82; RRID: AB_465243   |

|                                                                 |                           |                                    |
|-----------------------------------------------------------------|---------------------------|------------------------------------|
| GARP Monoclonal Antibody (YGIC86), eFluor 450, eBioscience (TM) | Thermo Fisher             | Cat# 48-9891-82, RRID: AB_10597007 |
| Anti-GITR-PE (clone DTA-1)                                      | eBioscience               | Cat#:12-5874-82; RRID: AB_465986   |
| Anti-GITR-PE-Cy7 (clone DTA-1)                                  | eBioscience               | Cat#:25-5874-82; RRID: AB_10548516 |
| Anti-Helios-PE (clone 22F6)                                     | eBioscience               | Cat#:12-9883-42; RRID: AB_2572758  |
| Anti-ICOS-V450 (clone 7E.17G9)                                  | BD Biosciences            | Cat#:564070; RRID: AB_2738576      |
| Anti-IFN- $\gamma$ functional (clone XMG1.2)                    | BioLegend                 | Cat#:505827; RRID: AB_2295769      |
| Anti-IFN $\gamma$ -PE (clone XMG1.2)                            | BD Biosciences            | Cat#:555412; RRID: AB_395376       |
| Anti-IFN $\gamma$ -PerCP-Cy5.5 (clone 4S.B3)                    | BD Biosciences            | Cat#:560742; RRID: AB_1727531      |
| Anti-IL4 functional (clone 11B11)                               | BD Biosciences            | Cat#:559062; RRID: AB_397187       |
| Anti-Ki67-FITC                                                  | BD Biosciences            | Cat#:612472; RRID: AB_399649       |
| Anti-KLRG1-PE (clone 2F1)                                       | eBioscience               | Cat#:12-5893-82; RRID: AB_10596642 |
| Anti-KLRG1-V450 (clone 2F1)                                     | Invitrogen                | Cat#:48-5893-82; RRID: AB_10852843 |
| Anti-MHCI-APC (clone AF6-88.5.5.3)                              | eBioscience               | Cat#:17-5958-82; RRID: AB_1311280  |
| Anti-MHCII-FITC (clone M5/114.15.2)                             | eBioscience               | Cat#:11-5321-85; RRID: AB_465233   |
| Anti-Moesin antibody                                            | Cell Signaling Technology | Cat#:3150; RRID: AB_2266802        |
| Anti-mouse-IgG-FITC                                             | eBioscience               | Cat#:11-4011-85; RRID: AB_465218   |
| Anti-mouse-IgG-PE (clone A85-1)                                 | BD Biosciences            | Cat#:550083; RRID: AB_393553       |
| Anti-Nrp1-APC (clone 3DS304M)                                   | eBioscience               | Cat#:17-3041-82; RRID: AB_2573196  |
| Anti-Nrp1-PE-Cy7 (clone 3DS304M)                                | eBioscience               | Cat# 25-3041-82; RRID: AB_2573436  |
| Anti-PCBP1 antibody                                             | Cell Signaling Technology | Cat# 8534; RRID: AB_11129258       |
| Anti-PD-1-APC (clone J43)                                       | eBioscience               | Cat# 17-9985-82; RRID: AB_11149358 |
| Anti-PD-1-PE (clone J43)                                        | BD Biosciences            | Cat# 551892; RRID: AB_394284       |
| Anti-pSmad2/3-APC (clone O72-670)                               | BD Biosciences            | Cat# 562696; RRID: AB_2716578      |
| Anti-Phospho-Smad3 Antibody (EP823Y)                            | Abcam                     | Cat# ab52903                       |



| Anti-Smad3 Antibody (EP568Y)                                              | Abcam           | Cat# ab40854                         |
|---------------------------------------------------------------------------|-----------------|--------------------------------------|
| Anti-eIF5A2 (EPR7411-6)                                                   | Abcam           | Cat# ab126735                        |
| Anti-ROR $\gamma$ t-APC (clone B2D)                                       | eBioscience     | Cat# 17-6981-82; RRID:<br>AB_2573254 |
| REAGENT or RESOURCE                                                       | SOURCE          | IDENTIFIER                           |
| Anti-Satb1-APC (clone 14/SATB1)                                           | BD Biosciences  | Cat# 562378; RRID:<br>AB_11153310    |
| Anti-T-bet-PE-Cy7 (clone 4B10)                                            | eBioscience     | Cat# 25-5825-8; RRID:<br>AB_11042699 |
| Anti-TCR $\beta$ -APC (clone H57-597)                                     | BD Biosciences  | Cat# 553174; RRID: AB_398534         |
| Anti-TIGIT-V450 (clone 1G9)                                               | BD Biosciences  | Cat# 565270; RRID:<br>AB_2688007     |
| Anti-TNF $\alpha$ -PE-Cy7 (clone MP6-XT22)                                | BD Biosciences  | Cat# 557644; RRID: AB_396761         |
| Anti-VISTA-PE (clone MIH64)                                               | BD Biosciences  | Cat# 566269; RRID:<br>AB_2744494     |
| Chemicals, Peptides, and Recombinant Proteins                             |                 |                                      |
| Recombinant Human IL-2                                                    | PeptoTech       | Cat# 200-02                          |
| Recombinant Human IL-2                                                    | NIH Repository  | N/A                                  |
| Recombinant Human IL12p70                                                 | PeptoTech       | Cat# 200-12H                         |
| Recombinant Human TGF- $\beta$ 1                                          | PeptoTech       | Cat# 100-21                          |
| PMA                                                                       | Sigma Aldrich   | Cat# P8139                           |
| Ionomycin                                                                 | Sigma Aldrich   | Cat# I0634                           |
| Fixable Viability Dye                                                     | eBioscience     | Cat# 65-0866-14                      |
| Brefeldin A Solution (1000X)                                              | ThermoFisher    | Cat# 00-4506-51                      |
| ACK Lysing Buffer                                                         | Homemade        | N/A                                  |
| Critical Commercial Assays                                                |                 |                                      |
| CD4 <sup>+</sup> CD25 <sup>+</sup> Regulatory T Cell Isolation Kit, mouse | Miltenyi Biotec | Cat# 130-091-041                     |
| CD8a T Cell Isolation Kit, mouse                                          | Miltenyi Biotec | Cat# 130-104-075                     |
| FoxP3/Transcription Factor Staining Buffer Set Kit                        | eBioscience     | Cat# 00-5523-00                      |
| Dynabeads FlowComp Human CD4 Kit                                          | Thermo Fisher   | Cat# 11361D                          |
| Dynabeads FlowComp Human CD8 Kit                                          | Thermo Fisher   | Cat# 11362D                          |
| Dynabead Human T-Activator                                                | Thermo Fisher   | Cat# 11161D                          |
| eBioscience Fixable Viability Dye                                         | Thermo Fisher   | Cat# 65-0866-18                      |
| Genomic DNA clean & concentrator                                          | QIAGEN          | Cat# 28304                           |
| RNeasy Mini Kit                                                           | QIAGEN          | Cat# 74104                           |
| Deposited Data                                                            |                 |                                      |
| RNA-Seq data                                                              | This paper      | GEO: GSE131826                       |
| Experimental Models: Cells                                                |                 |                                      |

|                       |              |              |
|-----------------------|--------------|--------------|
| HEK293FT              | ThermoFisher | Cat# R70007  |
| Stbl3 competent cells | ThermoFisher | Cat# C737303 |

#### Experimental Models: Organisms/Strains

| REAGENT or RESOURCE                                                       | SOURCE        | IDENTIFIER  |
|---------------------------------------------------------------------------|---------------|-------------|
| Mouse: Tg(Cd4-cre)1Cwi                                                    | Jackson Labs  | JAX: 022071 |
| Mouse: B6, <i>Pcbp1</i> <sup>f/f</sup> <i>Foxp3</i> <sup>YFP-Cre+</sup>   | This paper    | N/A         |
| Mouse: B6, <i>Pcbp1</i> <sup>f/f</sup> <i>Cd4-Cre</i>                     | This paper    | N/A         |
| Mouse: B6, <i>Pcbp1</i> <sup>f/f</sup> <i>Foxp3</i> <sup>YFP-Cre+/-</sup> | This paper    | N/A         |
| Mouse: C57BL6                                                             | Jackson Labs  | Cat# 000664 |
| Mouse: BALB/c                                                             | Charles River | Cat# 028    |
| Mouse: NOD <i>Rag1</i> <sup>-/-</sup>                                     | Jackson Labs  | Cat# 007799 |

#### Oligonucleotides

|                                                                                                                                          |            |     |
|------------------------------------------------------------------------------------------------------------------------------------------|------------|-----|
| shRNA targeting sequence: mouse<br><i>Pcbp1</i> : CCG GCC ATG ATC CAA<br>CTG TGT AAT TCT CGA GAA<br>TTA CAC AGT TGG ATC ATG<br>GTT TTT G | This paper | N/A |
|------------------------------------------------------------------------------------------------------------------------------------------|------------|-----|

#### Recombinant DNA

|                      |               |     |
|----------------------|---------------|-----|
| pLKO.1 shRNA plasmid | Sigma-Aldrich | N/A |
|----------------------|---------------|-----|

#### Software and Algorithms

|                     |                |                                                                                  |
|---------------------|----------------|----------------------------------------------------------------------------------|
| Flow Jo. v.8 & v.10 | Tree Star Inc. | <a href="https://www.flowjo.com">https://www.flowjo.com</a> ;RRID:SCR_008520     |
| Prism v.5 & v.8     | GraphPad       | <a href="https://www.graphpad.com">https://www.graphpad.com</a>                  |
| edgeR software      | Bioconductor   | <a href="http://www.bioconductor.org/packages">www.bioconductor.org/packages</a> |

### CONTACT FOR REAGENT AND RESOURCE SHARING

Further information and requests for resources and reagents should be directed to and will be fulfilled by the Lead Contact, Dr. Zihai Li ([Zihai.Li@osumc.edu](mailto:Zihai.Li@osumc.edu)).
